# Supplementary material for: The Expression Characteristics and Function of the RECQ Family in Pan-Cancer
Source: MDPI journal article supplement (doi:10.3390/biomedicines11082318), 2023-08-21
Supplement: s1 [file s1]

## The expression characteristics and function of the RECQ family in pan-cancer

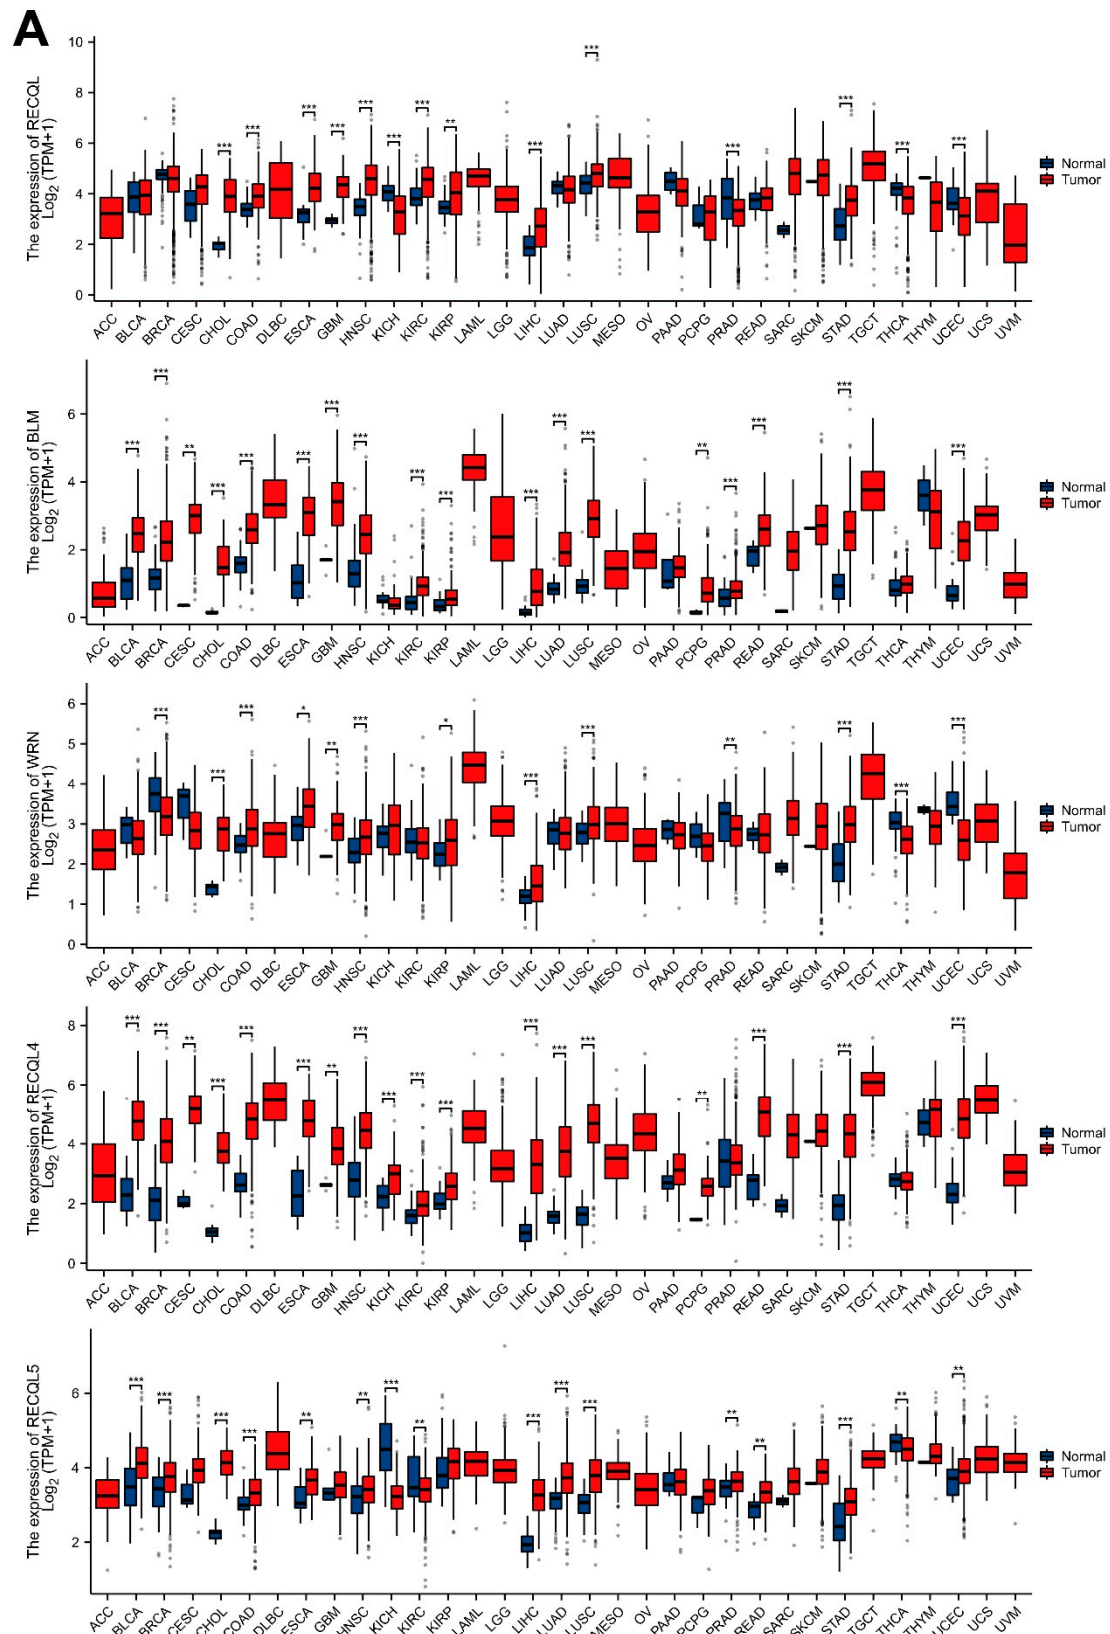

**Fig. S1** Expression of RECQ family in tumor and normal tissues. (A) The mRNA expression of RECQs was evaluated across 33 cancers from TCGA. \* $p < 0.05$ , \*\* $p < 0.01$ , \*\*\* $p < 0.001$ .

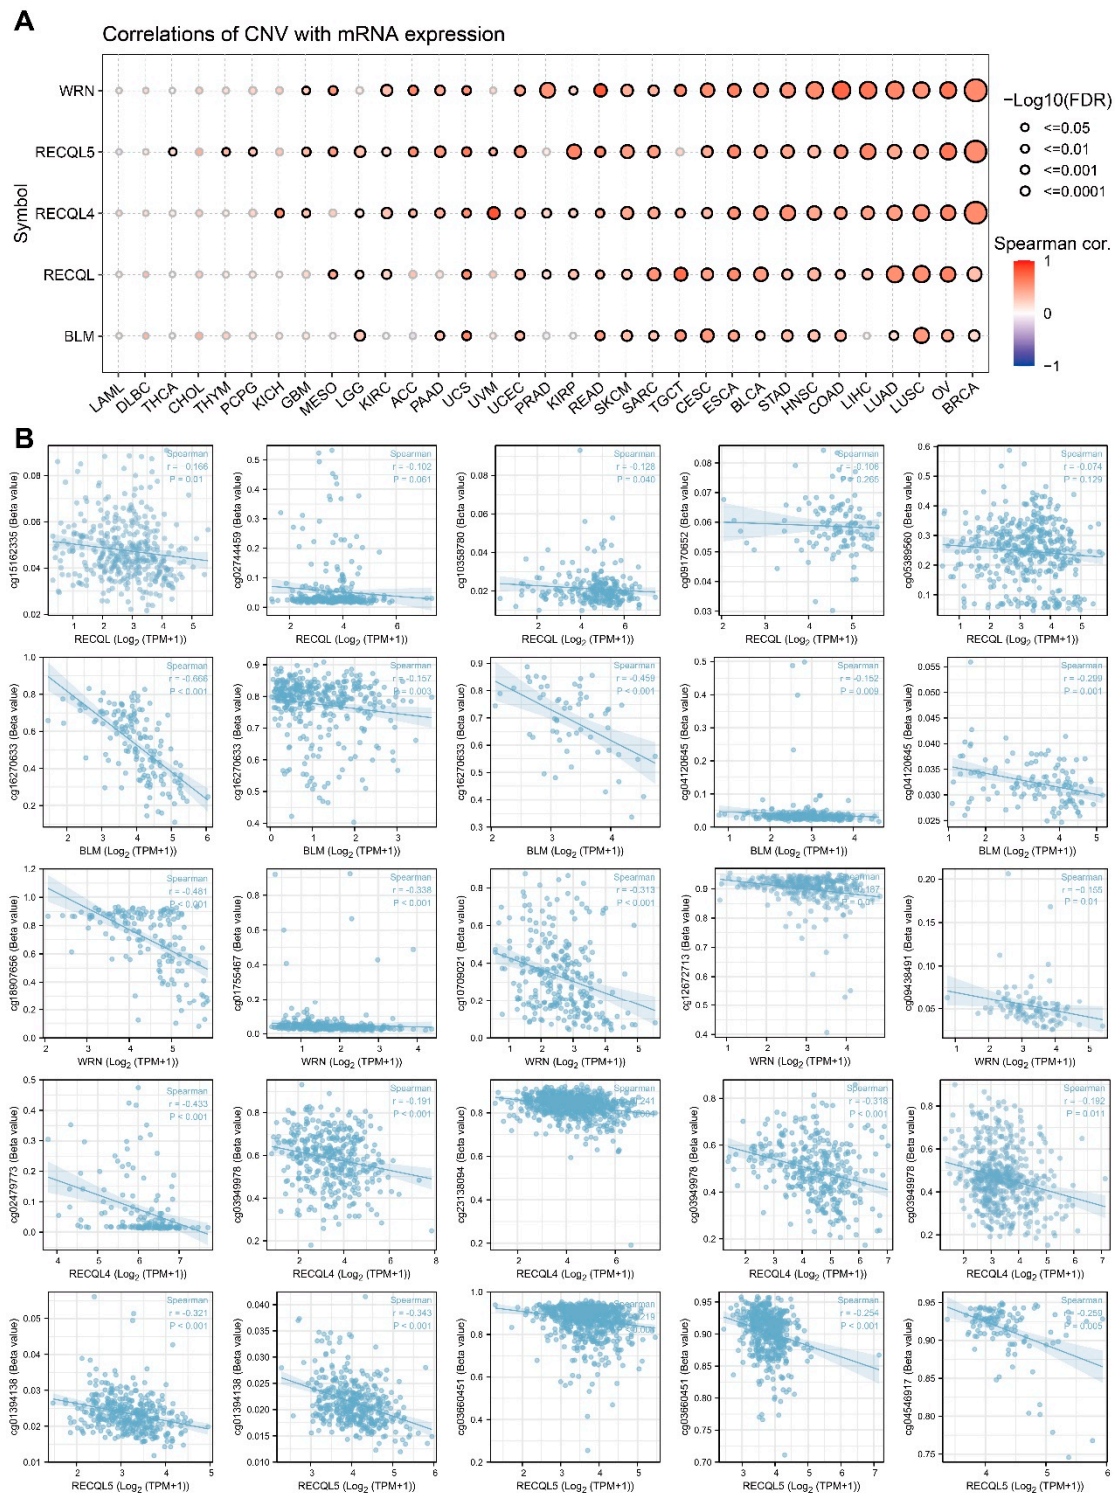

**Fig. S2** CNA and DNA methylation of RECQ family in human cancers. (A) The correlation between RECQs mRNA expression and CNV from TCGA. (B) The top 5 negative correlation between RECQs mRNA expression and DNA methylation was demonstrated by TCGA.

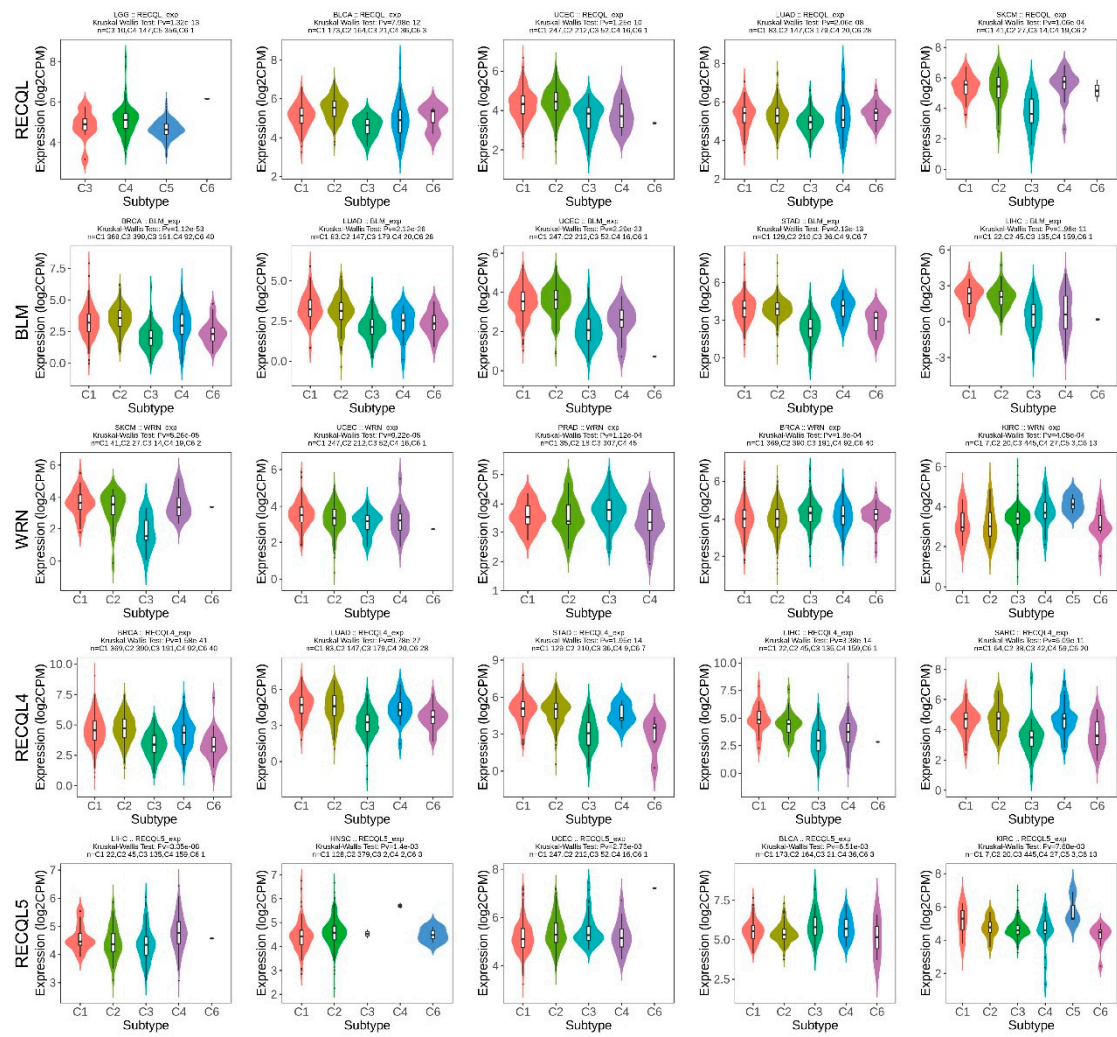

**Fig. S3** RECQ mRNA expression in different immune subtypes through TISIDB. Showing the five most statistically significant cancer types for each gene.

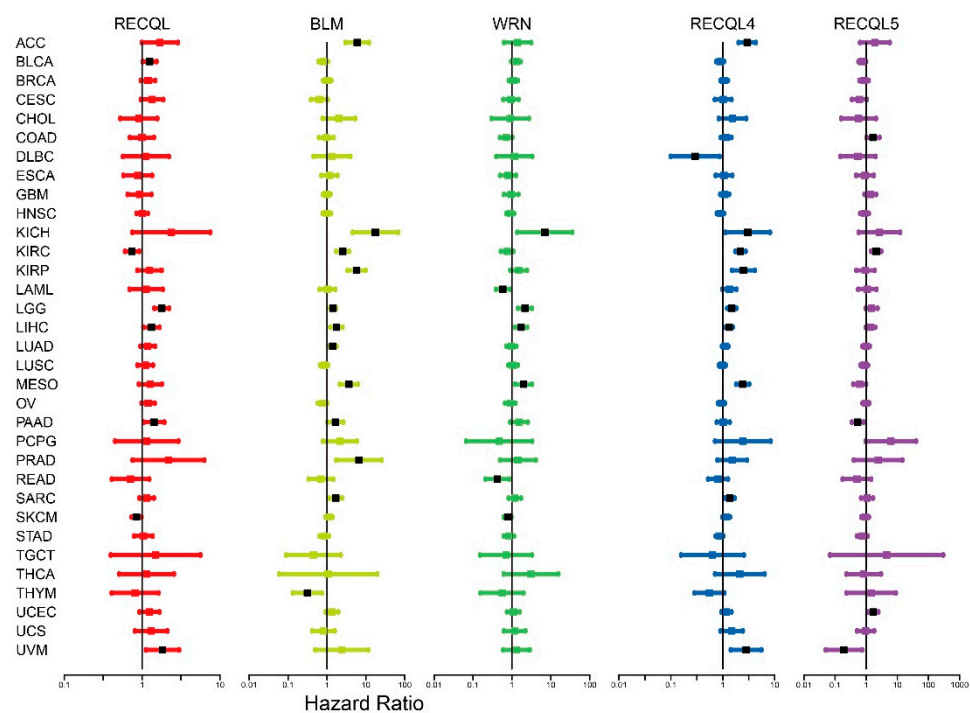

**Fig. S4** Overall survival prognosis forest map of RECQ family genes in TCGA. The prominently black labels indicated  $p < 0.05$ .
